# Supplementary material for: Direct synthesis of poly(α-olefin) thermoplastic elastomers via controlled chain straightening using bulky α-diimine palladium complexes
Source: Royal Society of Chemistry journal article supplement (doi:10.1039/d4py00353e), 2024-01-01
Supplement: d4py00353e1.pdf [file d4py00353e1.pdf]

## Supporting Information:

# Direct Synthesis of Poly( $\alpha$ -olefin) Thermoplastic Elastomers Via Controlled Chain Straightening Using Bulky $\alpha$ -Diimine Palladium Complexes

Hui Wang<sup>a</sup>, Qi Cai<sup>b,c</sup>, Shengyu Dai<sup>\*b</sup>

<sup>a</sup>Department of Chemistry and Chemical Engineering, Hefei Normal University, Hefei, China.

<sup>b</sup>Anhui Laboratory of Molecule-Based Materials; Key Laboratory of Functional Molecular Solids, Ministry of Education; School of Chemistry and Materials Science, Anhui Normal University, Wuhu, 241002, China.

<sup>c</sup>Institutes of Physical Science and Information Technology, Information Materials and Intelligent Sensing Laboratory of Anhui Province, Anhui University, Hefei, Anhui, 230601, China.

\*To whom correspondence should be addressed. daiyu@ustc.edu.cn (Shengyu Dai, +86/13955189794).

## 1. Spectra Data

### 1.1 <sup>1</sup>H NMR of Some Representative poly( $\alpha$ -olefin)s.

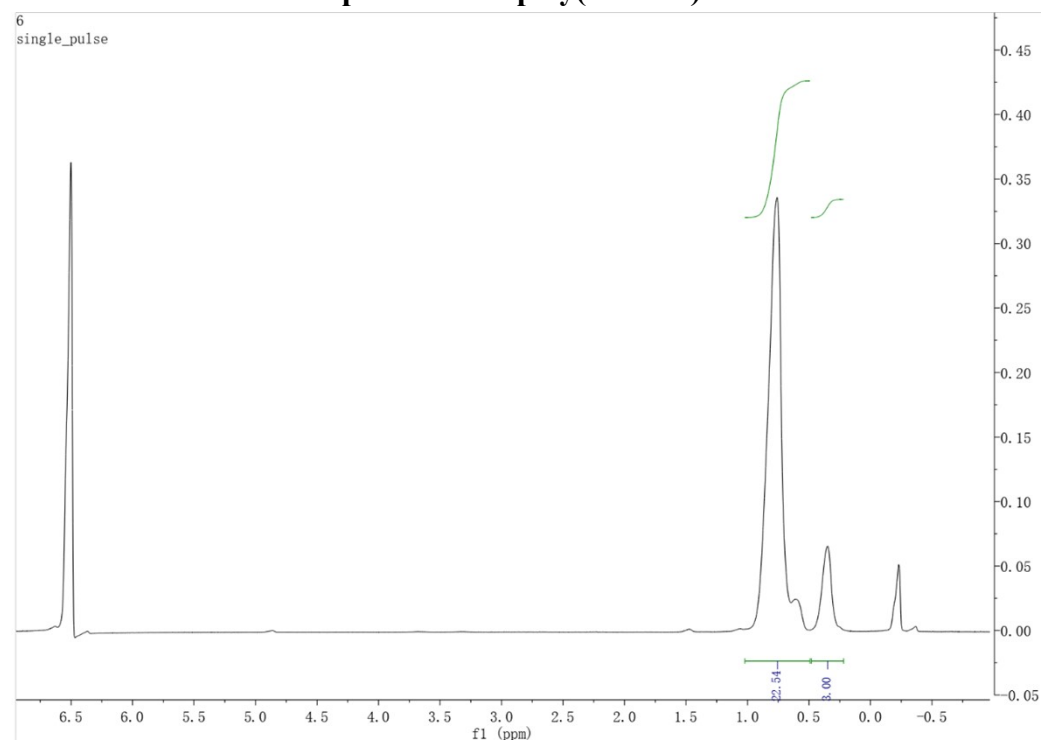

**Figure S1.** <sup>1</sup>H NMR spectrum of the poly( $\alpha$ -olefin) from table 1, entry 3 (C<sub>6</sub>D<sub>6</sub>, 20 °C).

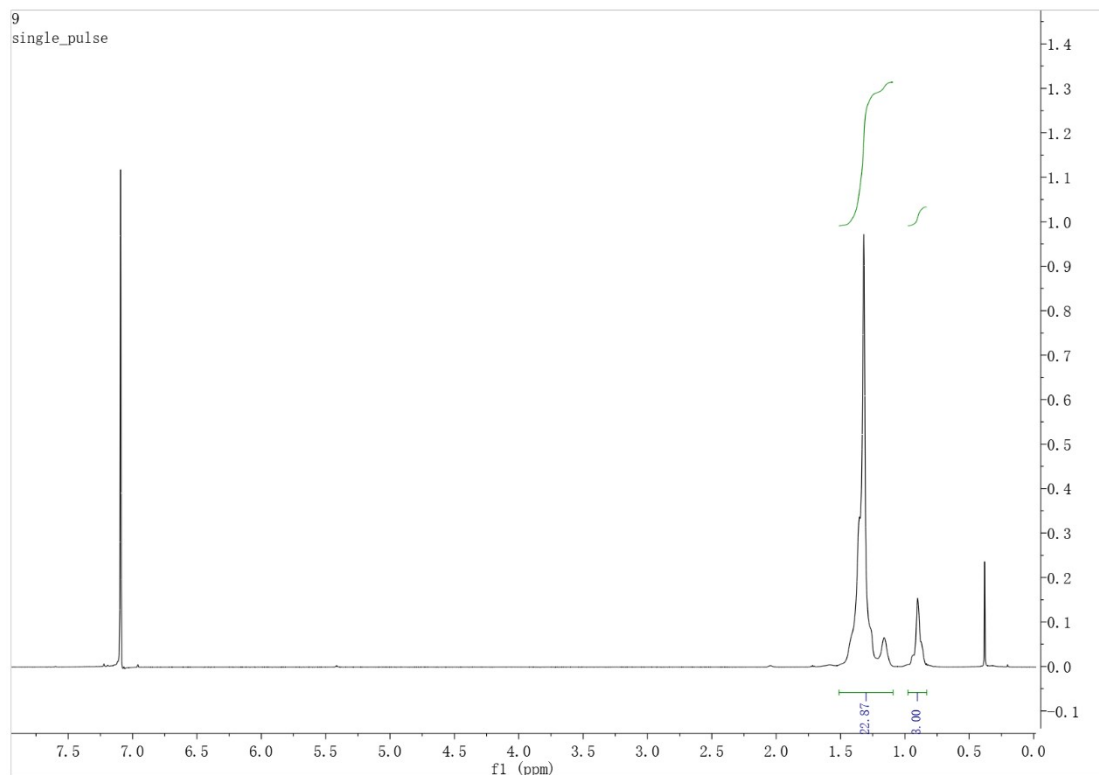

**Figure S2.**  $^1\text{H}$  NMR spectrum of the poly( $\alpha$ -olefin) from table 1, entry 5 ( $\text{C}_6\text{D}_6$ , 20  $^\circ\text{C}$ ).

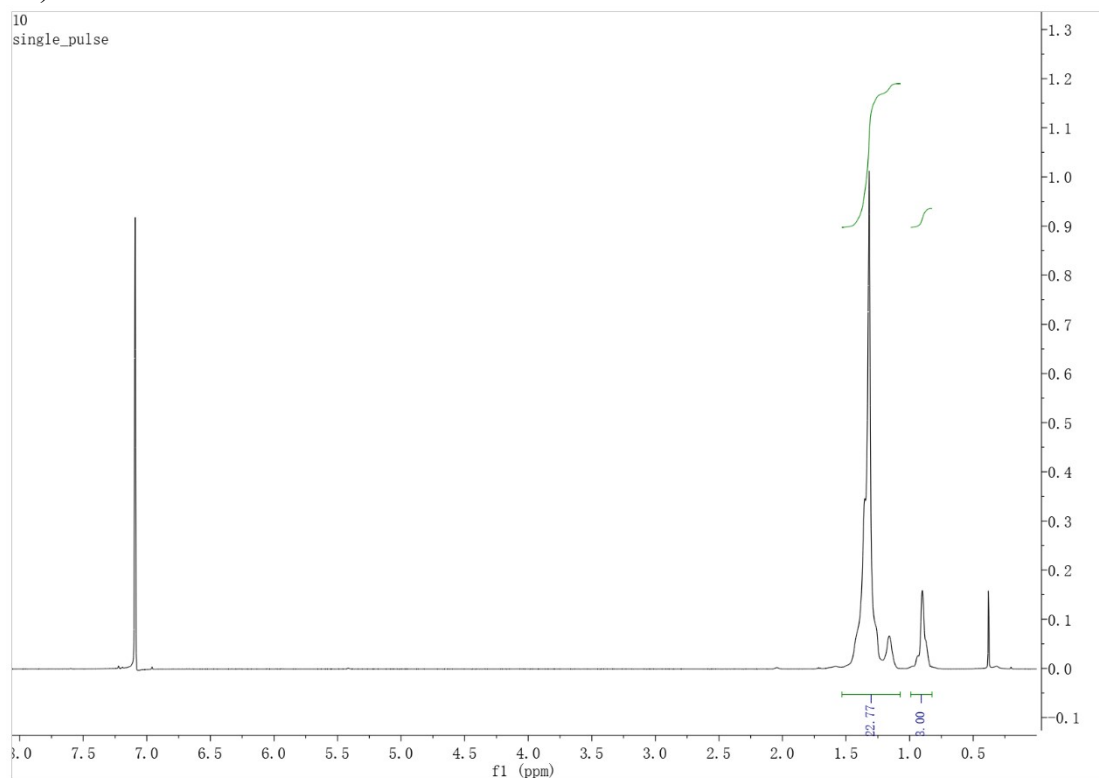

**Figure S3.**  $^1\text{H}$  NMR spectrum of the poly( $\alpha$ -olefin) from table 1, entry 6 ( $\text{C}_6\text{D}_6$ , 20  $^\circ\text{C}$ ).

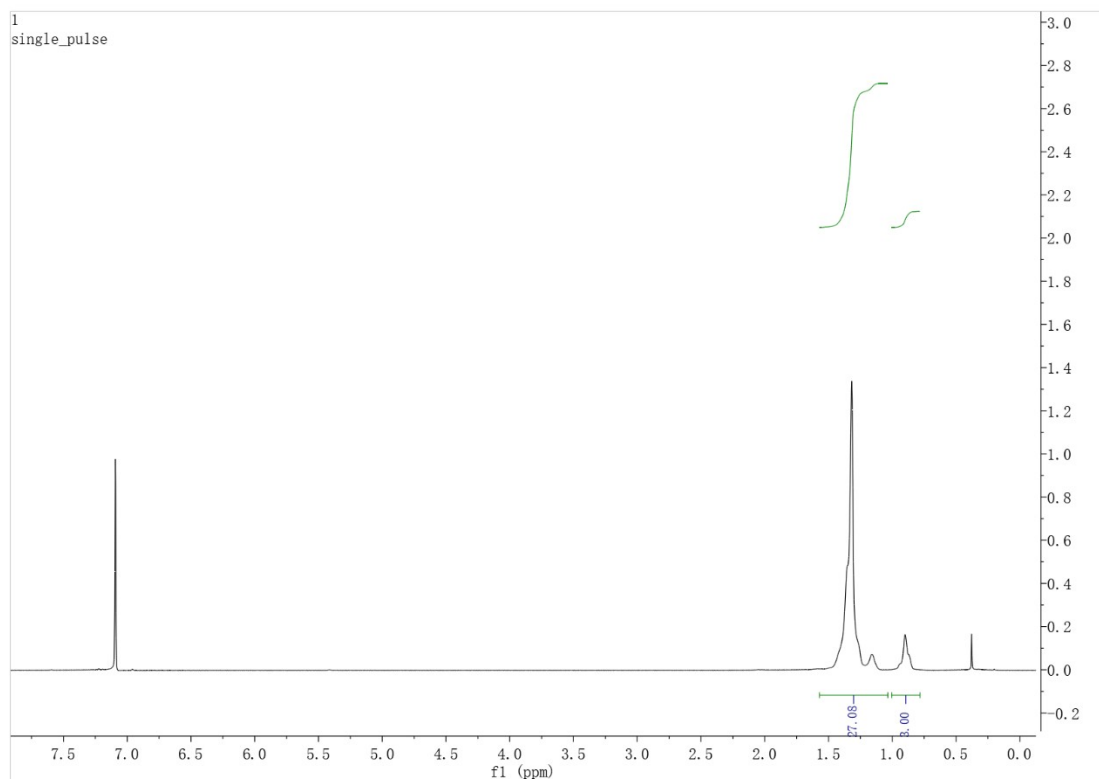

**Figure S4.** <sup>1</sup>H NMR spectrum of the poly( $\alpha$ -olefin) from table 1, entry 7 ( $C_6D_6$ , 20 °C).

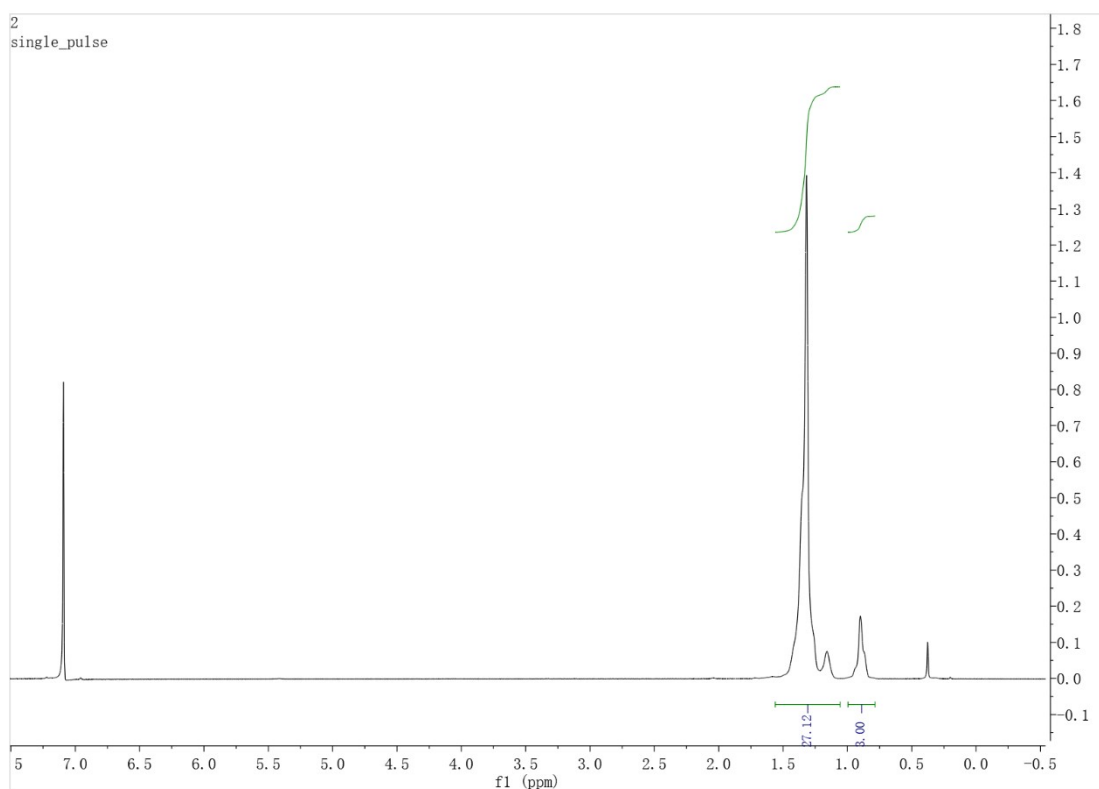

**Figure S5.** <sup>1</sup>H NMR spectrum of the poly( $\alpha$ -olefin) from table 1, entry 8 ( $C_6D_6$ , 20 °C).

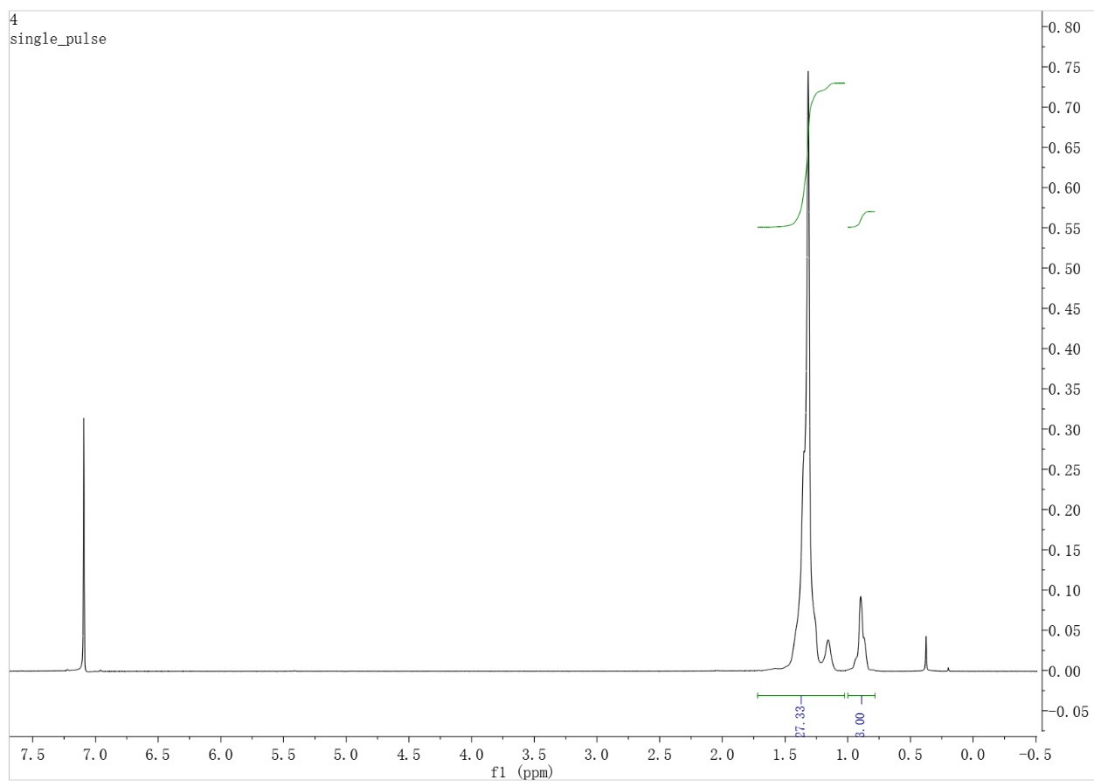

**Figure S6.** <sup>1</sup>H NMR spectrum of the poly( $\alpha$ -olefin) from table 1, entry 9 ( $C_6D_6$ , 20 °C).

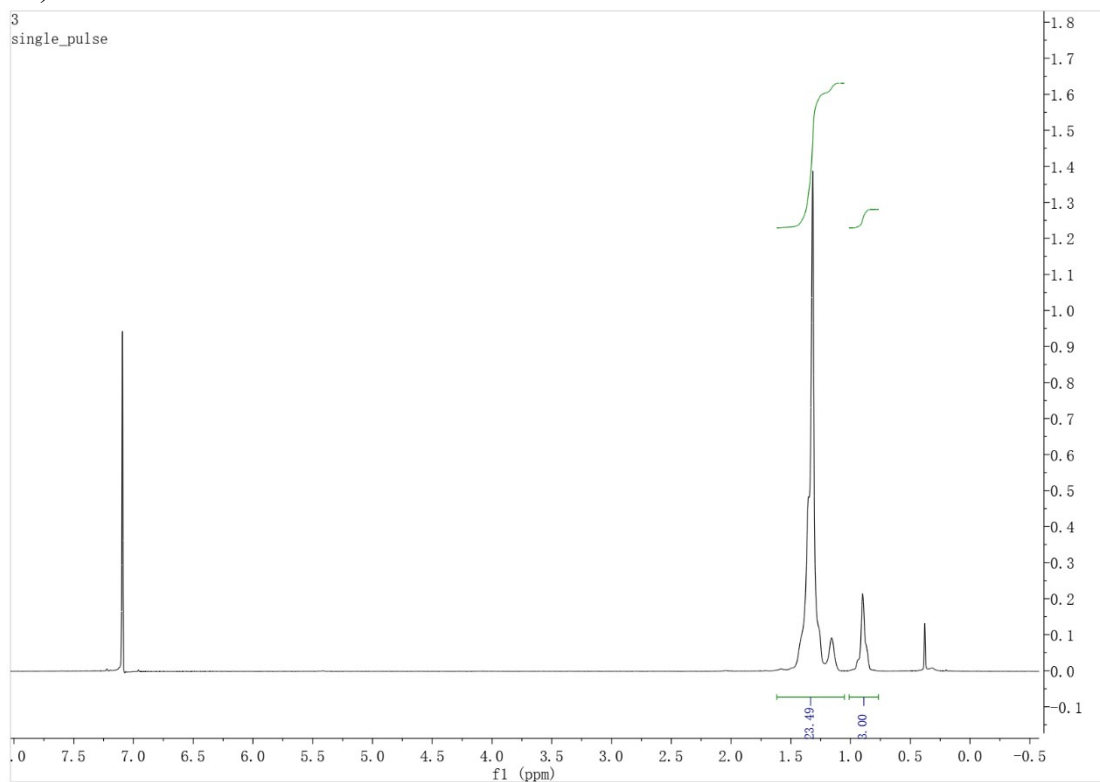

**Figure S7.** <sup>1</sup>H NMR spectrum of the poly( $\alpha$ -olefin) from table 1, entry 10 ( $C_6D_6$ , 20 °C).

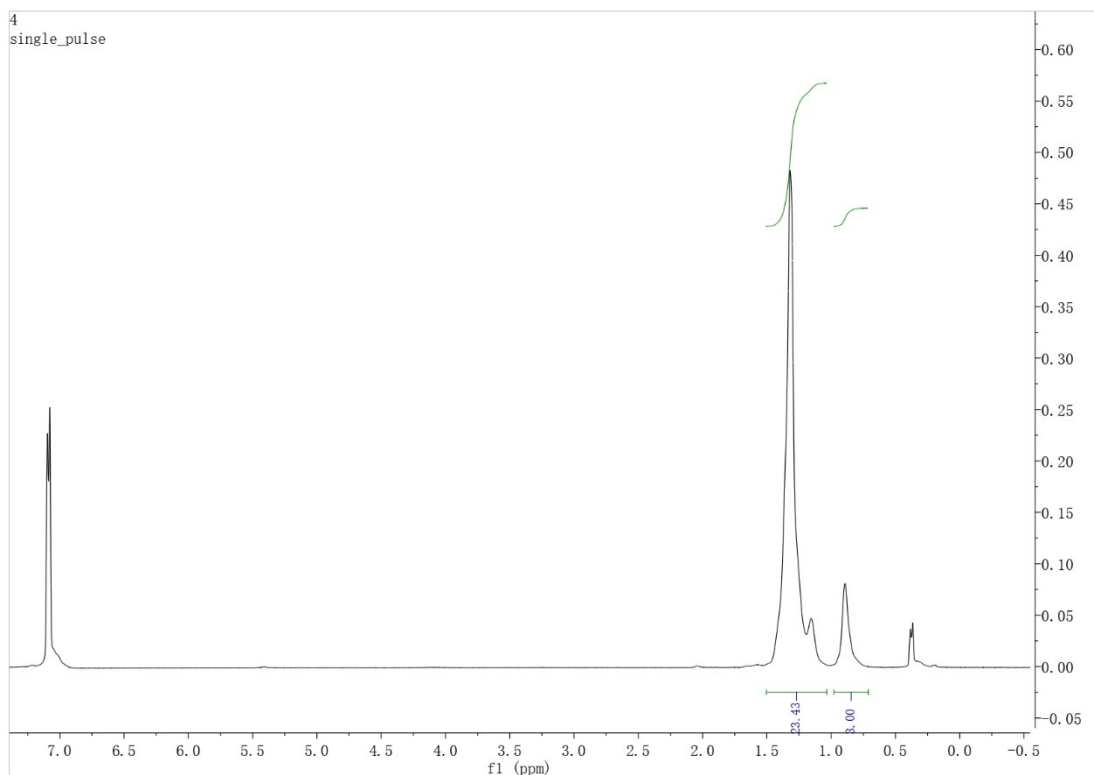

**Figure S8.**  $^1\text{H}$  NMR spectrum of the poly( $\alpha$ -olefin) from table 1, entry 11 ( $\text{C}_6\text{D}_6$ , 20  $^\circ\text{C}$ ).

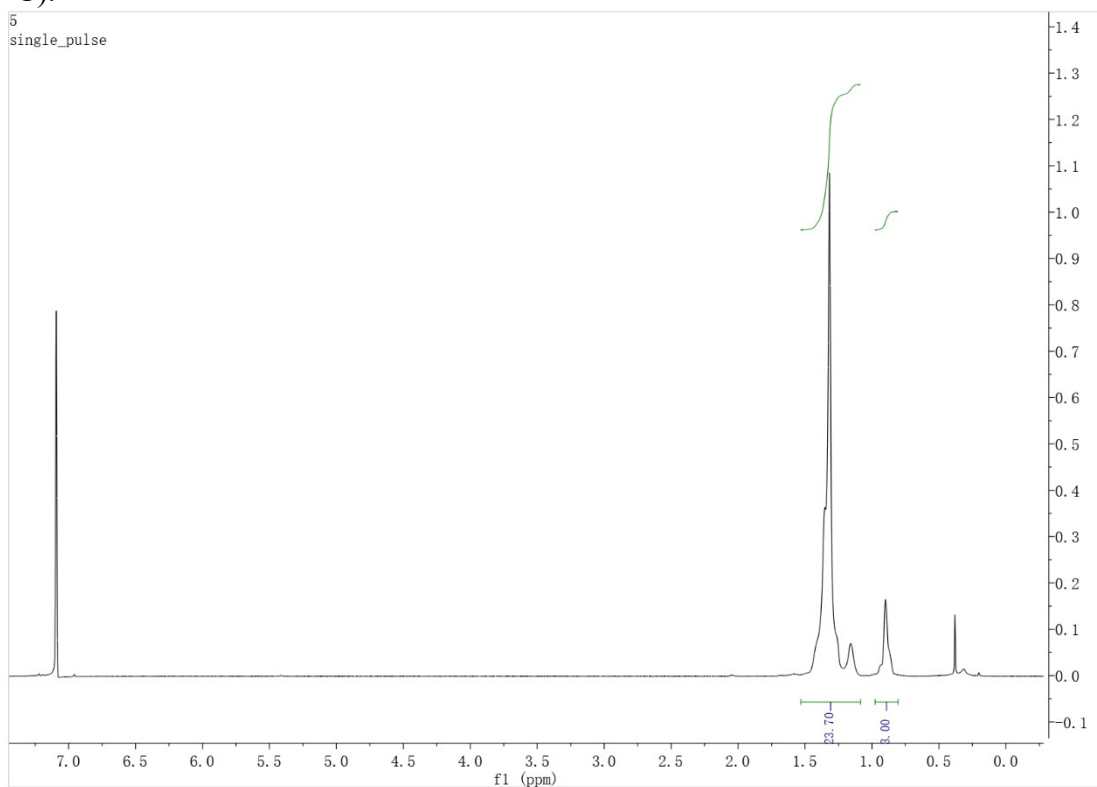

**Figure S9.**  $^1\text{H}$  NMR spectrum of the poly( $\alpha$ -olefin) from table 1, entry 12 ( $\text{C}_6\text{D}_6$ , 20  $^\circ\text{C}$ ).

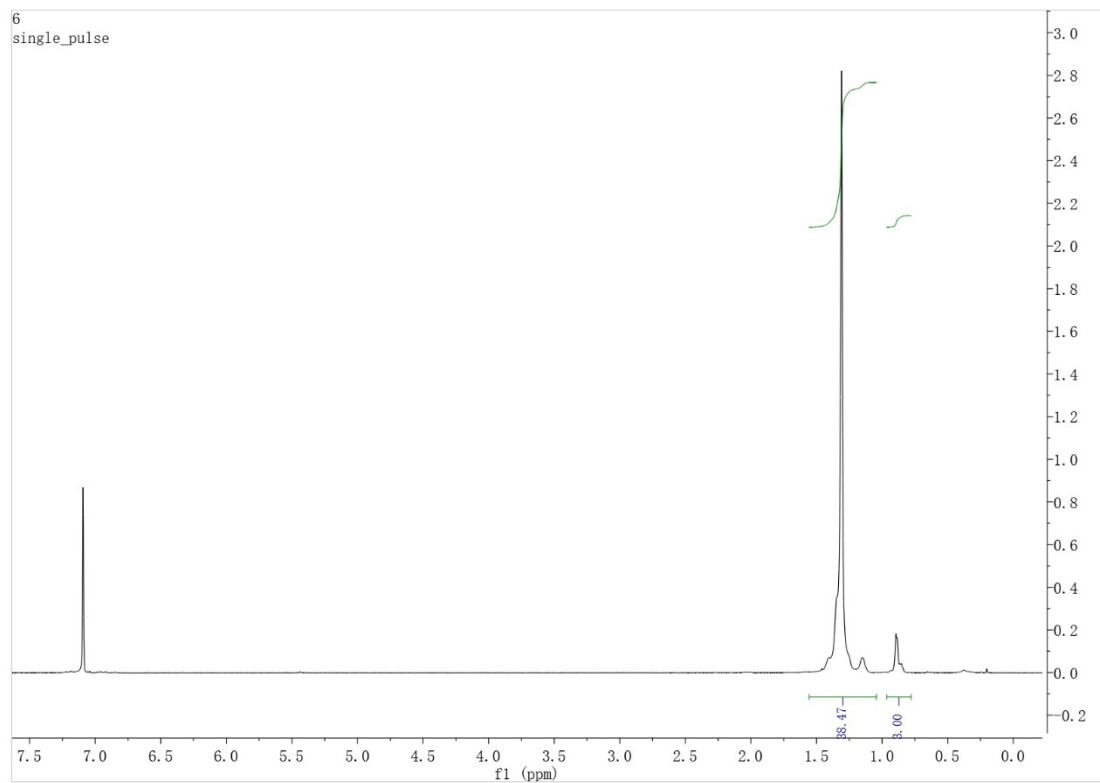

**Figure S10.**  $^1\text{H}$  NMR spectrum of the poly( $\alpha$ -olefin) from table 1, entry 16 ( $\text{C}_6\text{D}_6$ , 20  $^\circ\text{C}$ ).

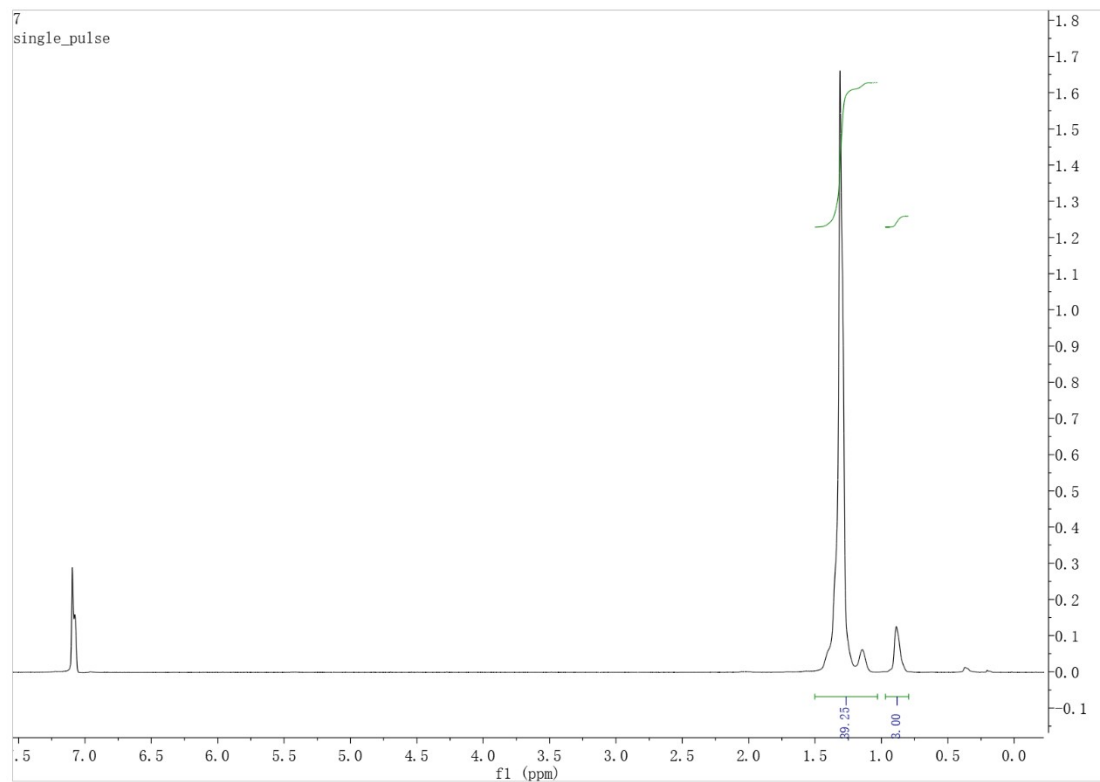

**Figure S11.**  $^1\text{H}$  NMR spectrum of the poly( $\alpha$ -olefin) from table 1, entry 17 ( $\text{C}_6\text{D}_6$ , 20  $^\circ\text{C}$ ).

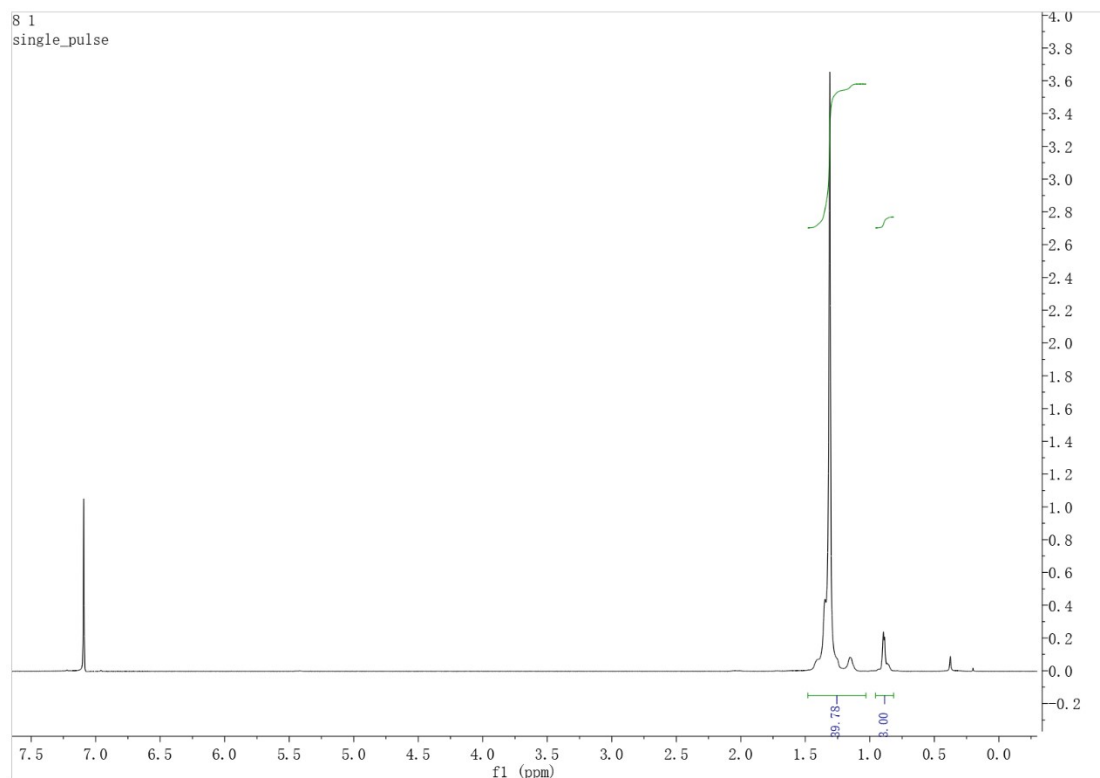

**Figure S12.**  $^1\text{H}$  NMR spectrum of the poly( $\alpha$ -olefin) from table 1, entry 18 ( $\text{C}_6\text{D}_6$ , 20  $^\circ\text{C}$ ).

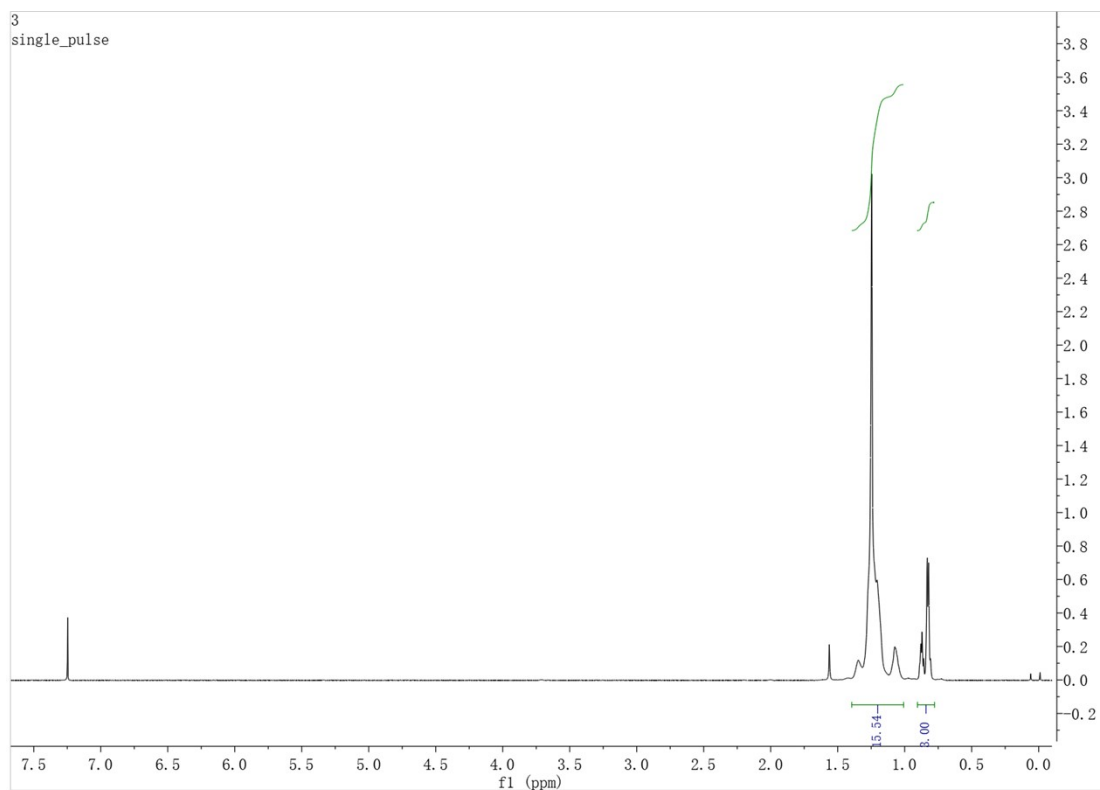

**Figure S13.**  $^1\text{H}$  NMR spectrum of the poly( $\alpha$ -olefin) from table 2, entry 1 ( $\text{CDCl}_3$ , 20  $^\circ\text{C}$ ).

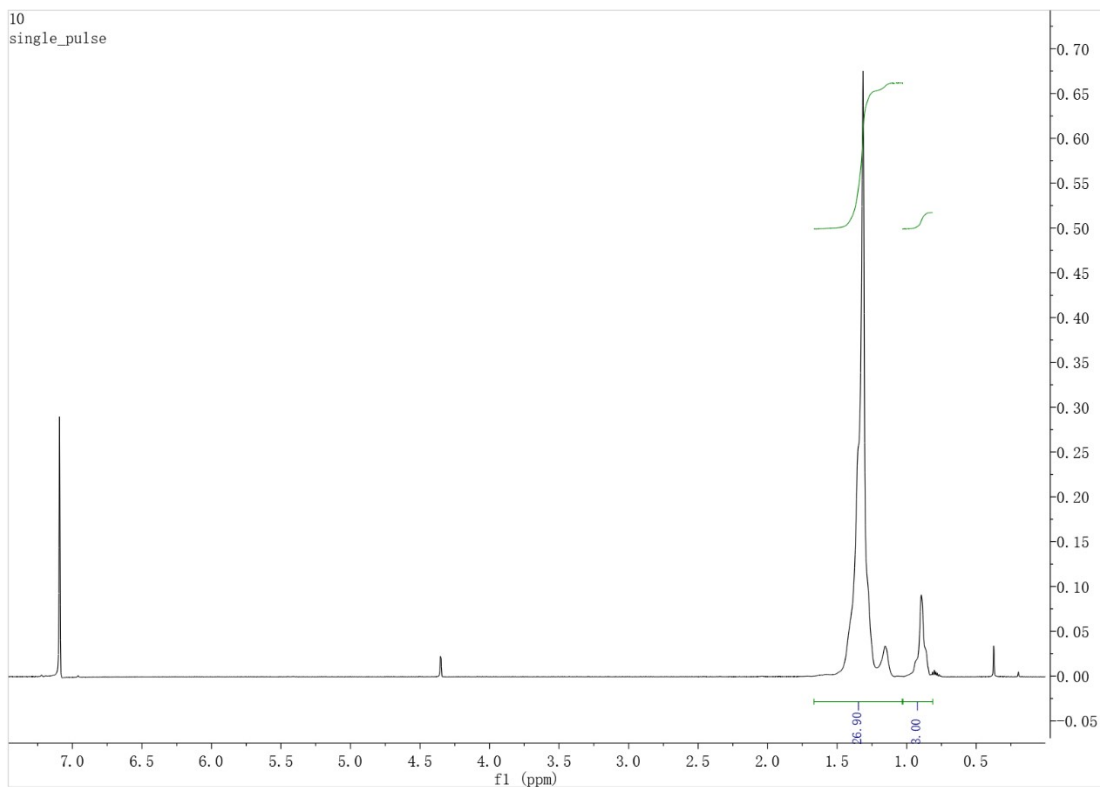

**Figure S14.**  $^1\text{H}$  NMR spectrum of the poly( $\alpha$ -olefin) from table 2, entry 3 ( $\text{C}_6\text{D}_6$ , 70  $^\circ\text{C}$ ).

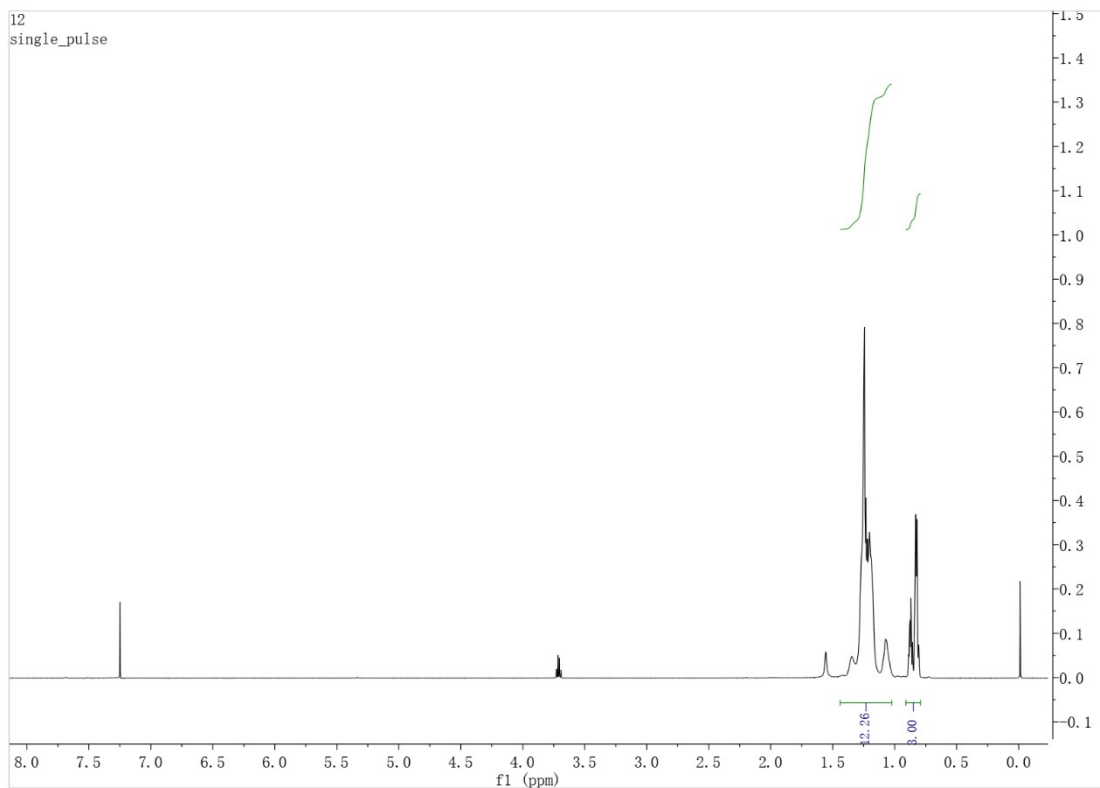

**Figure S15.**  $^1\text{H}$  NMR spectrum of the poly( $\alpha$ -olefin) from table 2, entry 4 ( $\text{CDCl}_3$ , 20  $^\circ\text{C}$ ).



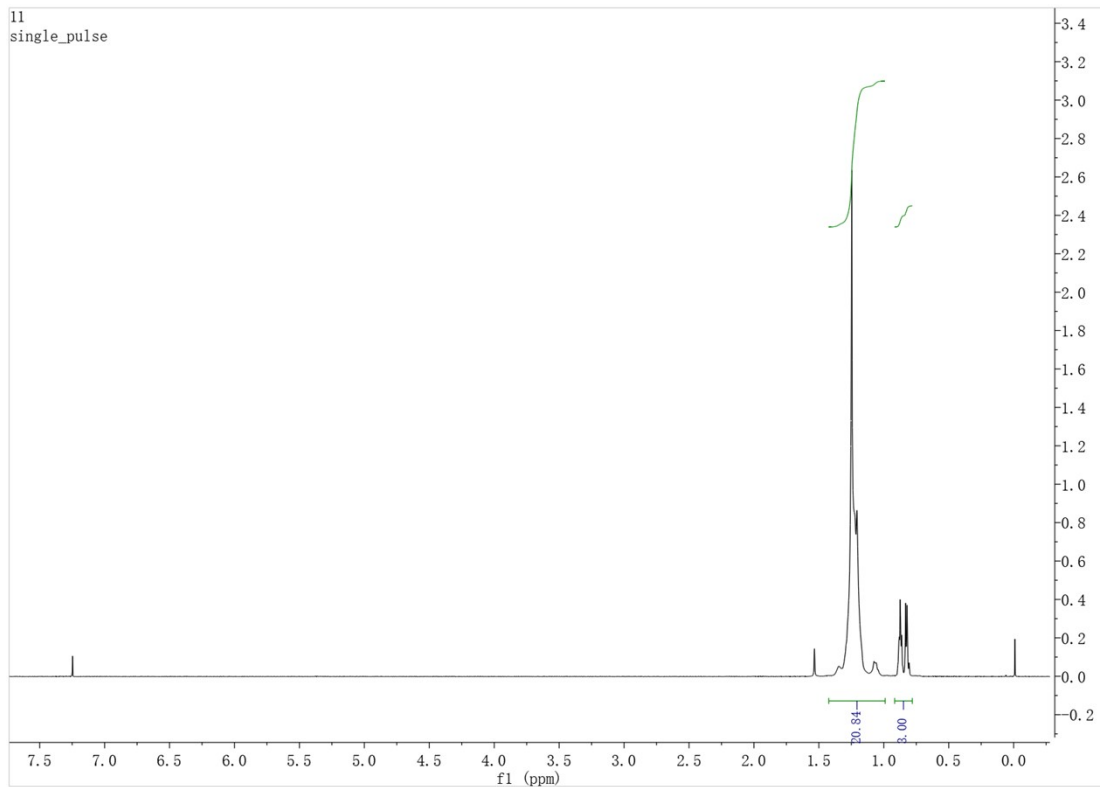

**Figure S16.** <sup>1</sup>H NMR spectrum of the poly( $\alpha$ -olefin) from table 2, entry 6 (CDCl<sub>3</sub>, 20 °C).

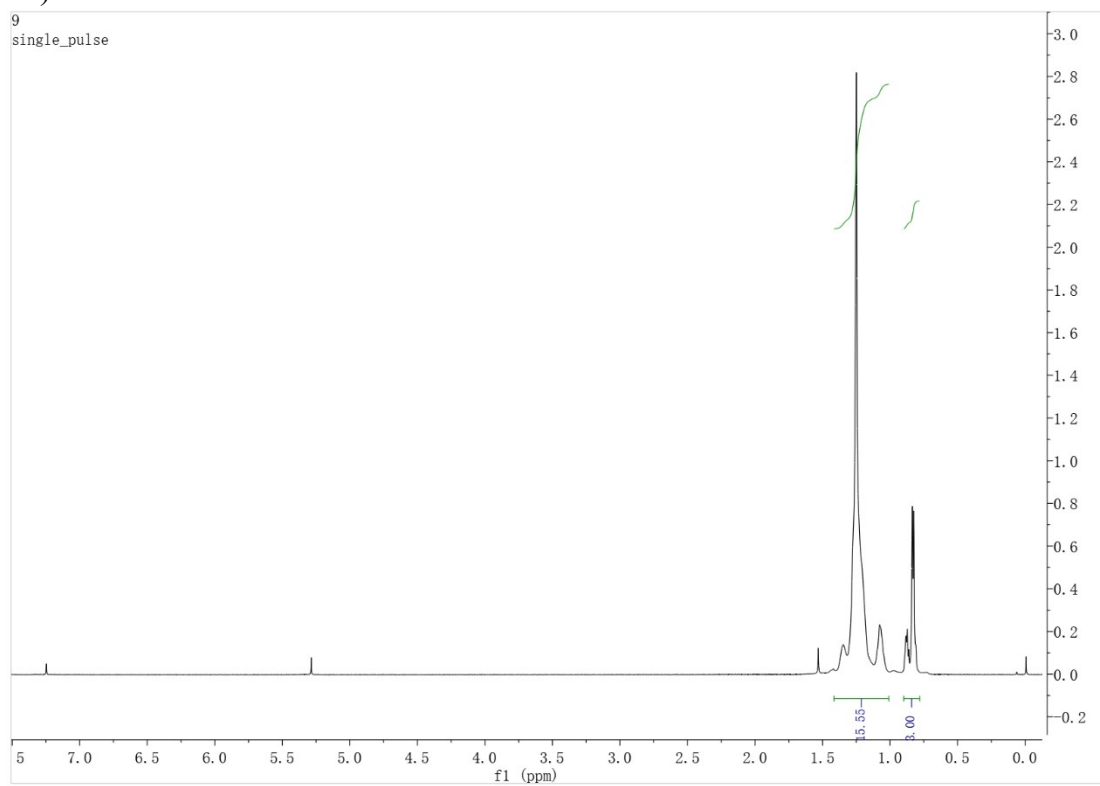

**Figure S17.** <sup>1</sup>H NMR spectrum of the poly( $\alpha$ -olefin) from table 2, entry 7 (CDCl<sub>3</sub>, 20 °C).

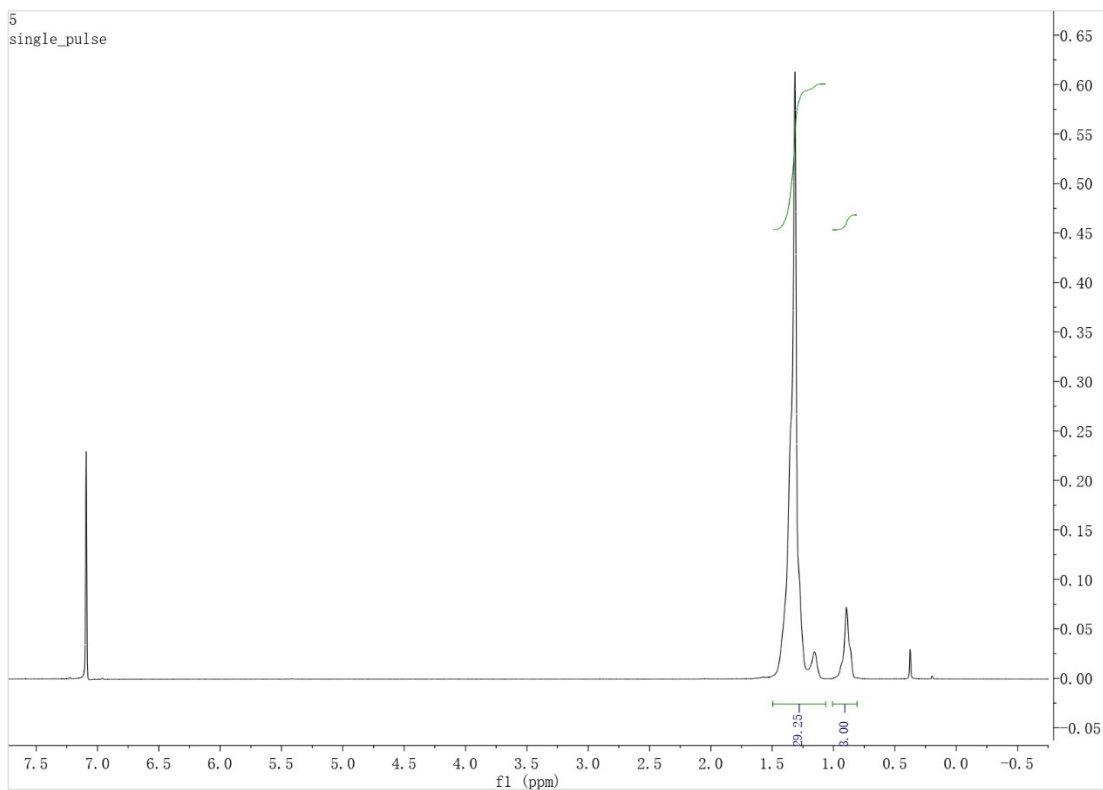

**Figure S18.**  $^1\text{H}$  NMR spectrum of the poly( $\alpha$ -olefin) from table 2, entry 9 ( $\text{C}_6\text{D}_6$ , 70  $^\circ\text{C}$ ).

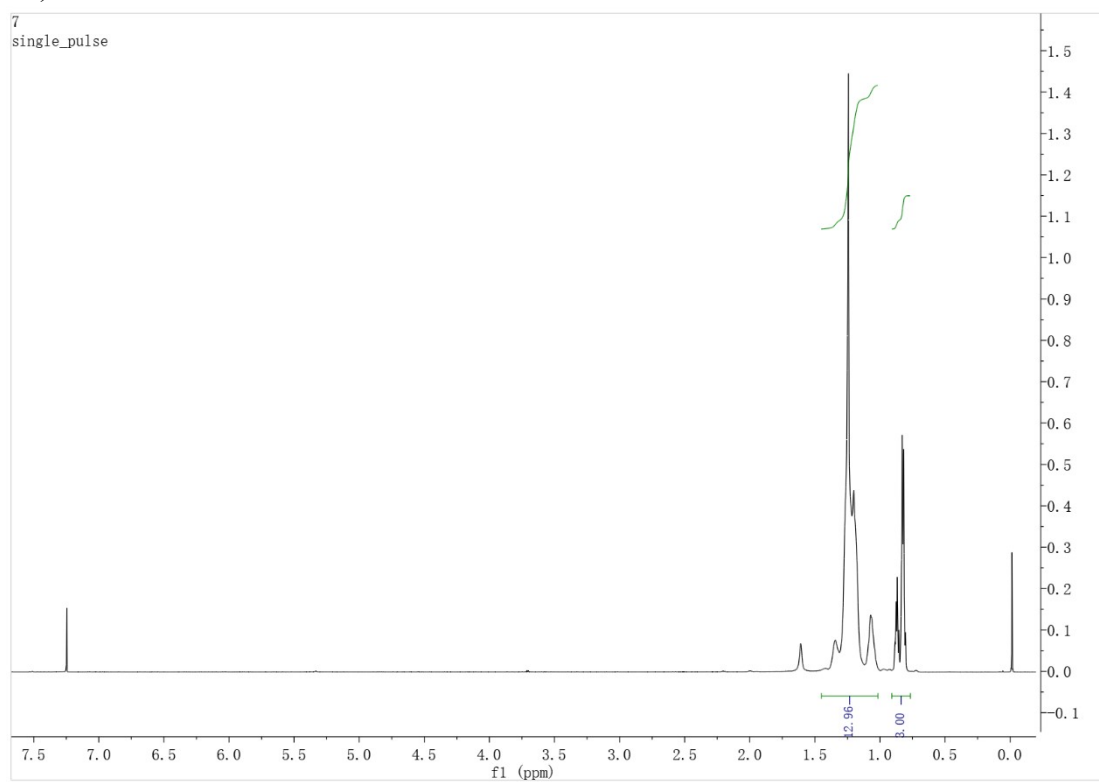

**Figure S19.**  $^1\text{H}$  NMR spectrum of the poly( $\alpha$ -olefin) from table 2, entry 10 ( $\text{CDCl}_3$ , 20  $^\circ\text{C}$ ).

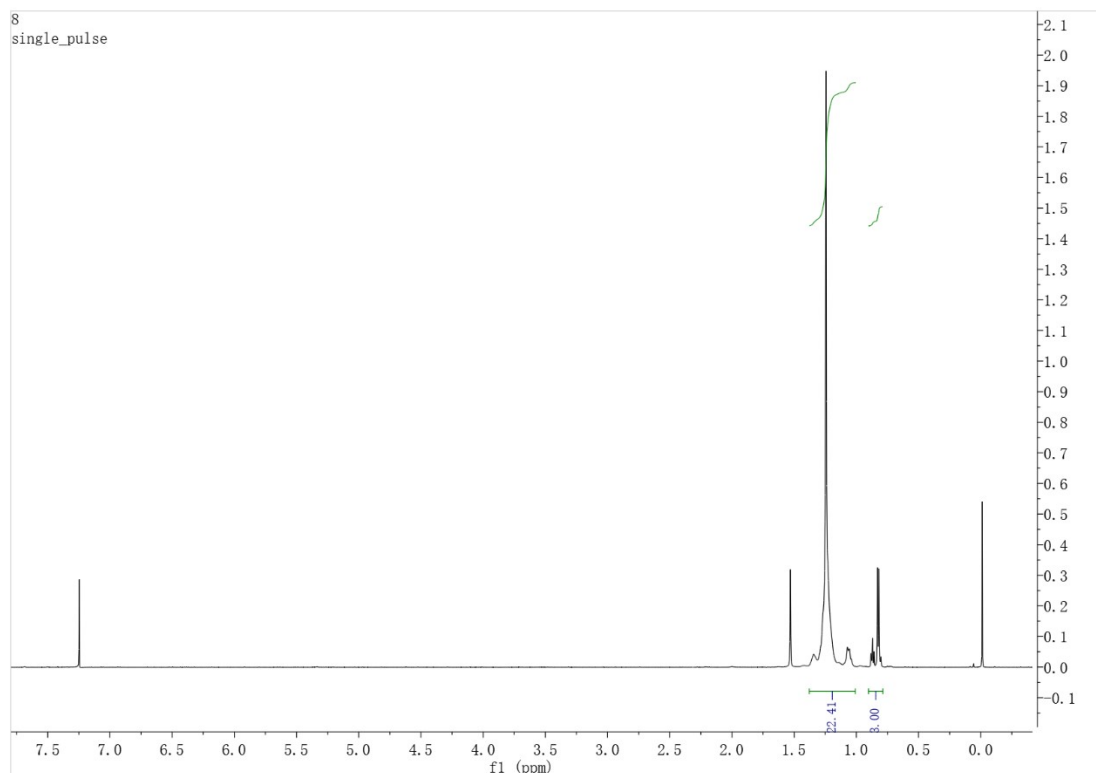

**Figure S20.**  $^1\text{H}$  NMR spectrum of the poly( $\alpha$ -olefin) from table 2, entry 12 ( $\text{CDCl}_3$ ,  $20^\circ\text{C}$ ).

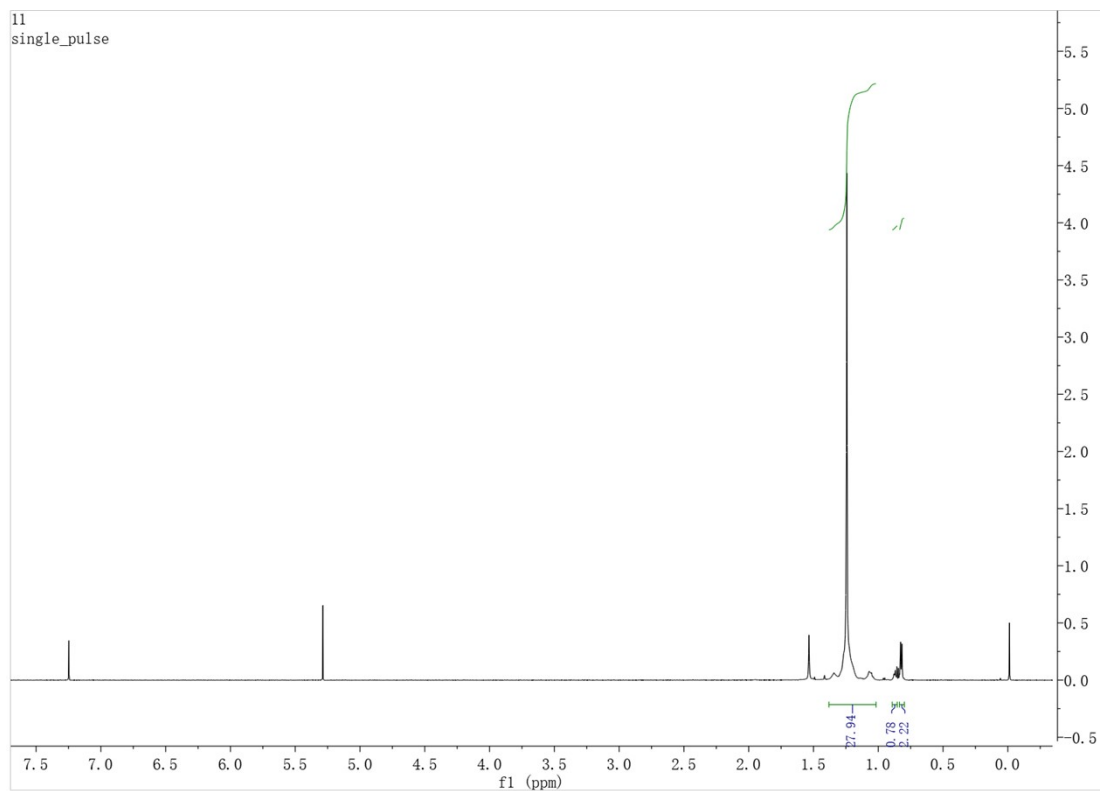

**Figure S21.**  $^1\text{H}$  NMR spectrum of the poly( $\alpha$ -olefin) from table 2, entry 13 ( $\text{CDCl}_3$ ,  $20^\circ\text{C}$ ).

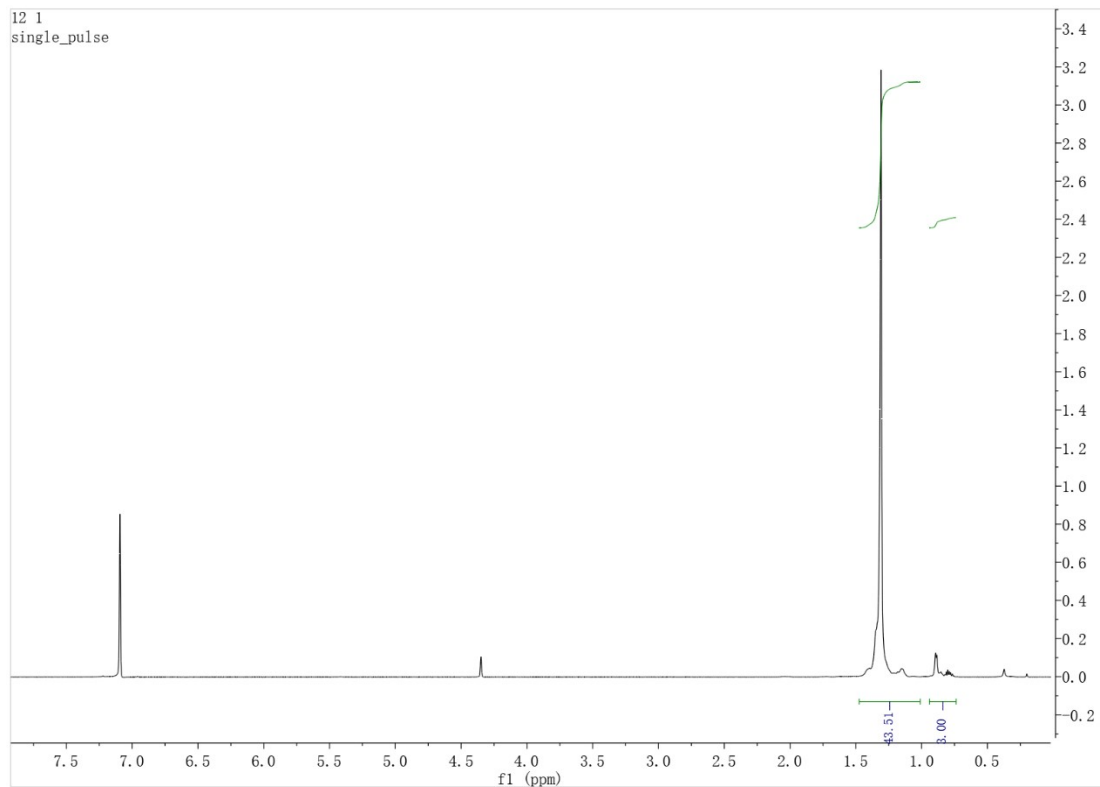

**Figure S22.**  $^1\text{H}$  NMR spectrum of the poly( $\alpha$ -olefin) from table 2, entry 15 ( $\text{C}_6\text{D}_6$ ,  $70^\circ\text{C}$ ).

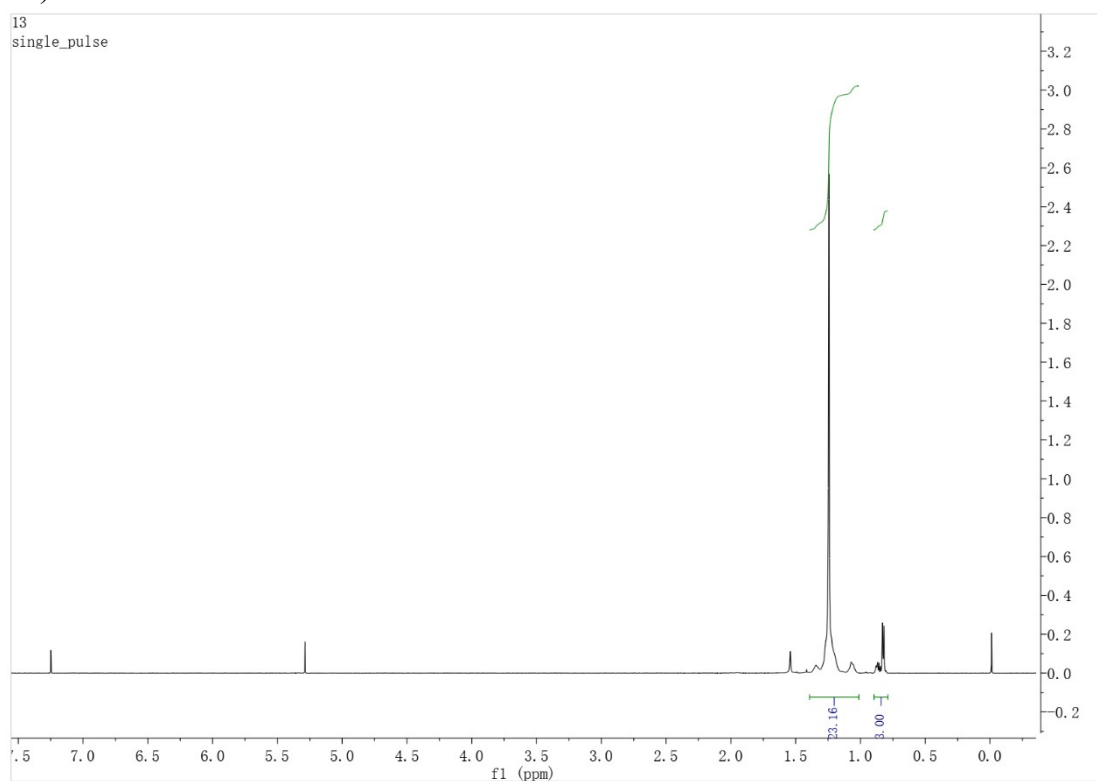

**Figure S23.**  $^1\text{H}$  NMR spectrum of the poly( $\alpha$ -olefin) from table 2, entry 16 ( $\text{CDCl}_3$ ,  $20^\circ\text{C}$ ).

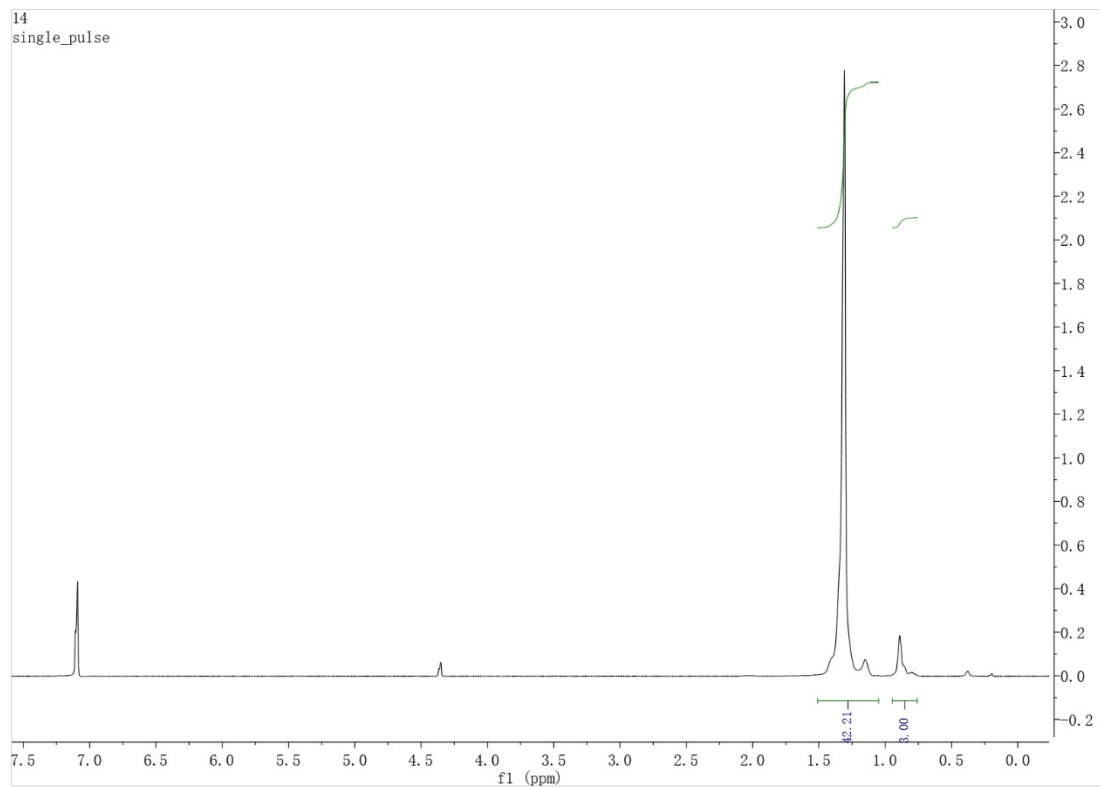

**Figure S24.** <sup>1</sup>H NMR spectrum of the poly( $\alpha$ -olefin) from table 2, entry 18 ( $C_6D_6$ , 70 °C).

### 1.2 DSC and GPC of Some Representative Poly( $\alpha$ -olefin)s.

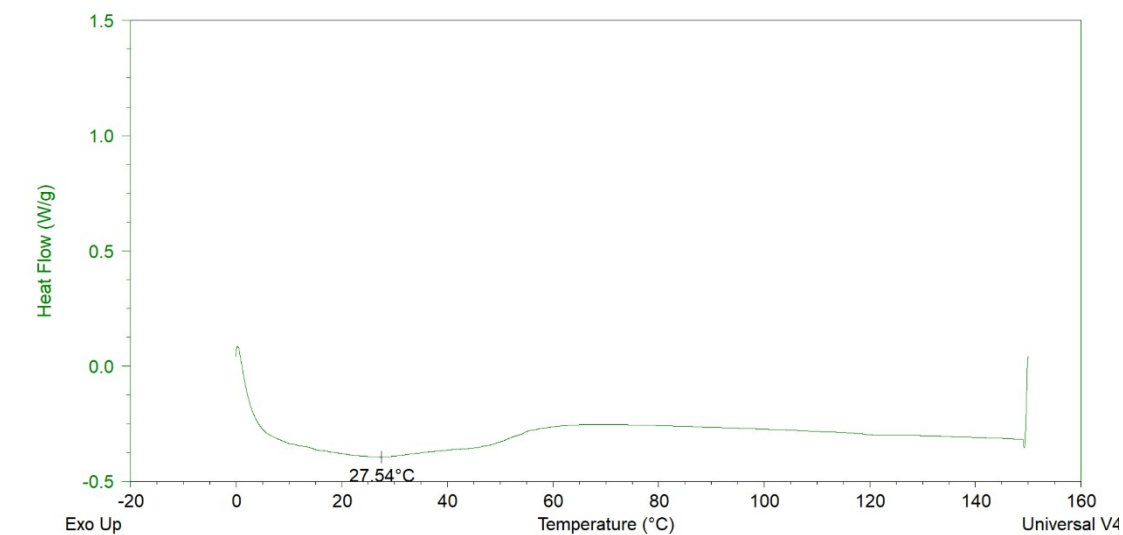

**Figure S25.** DSC of the poly( $\alpha$ -olefin) from table 1, entry 7.

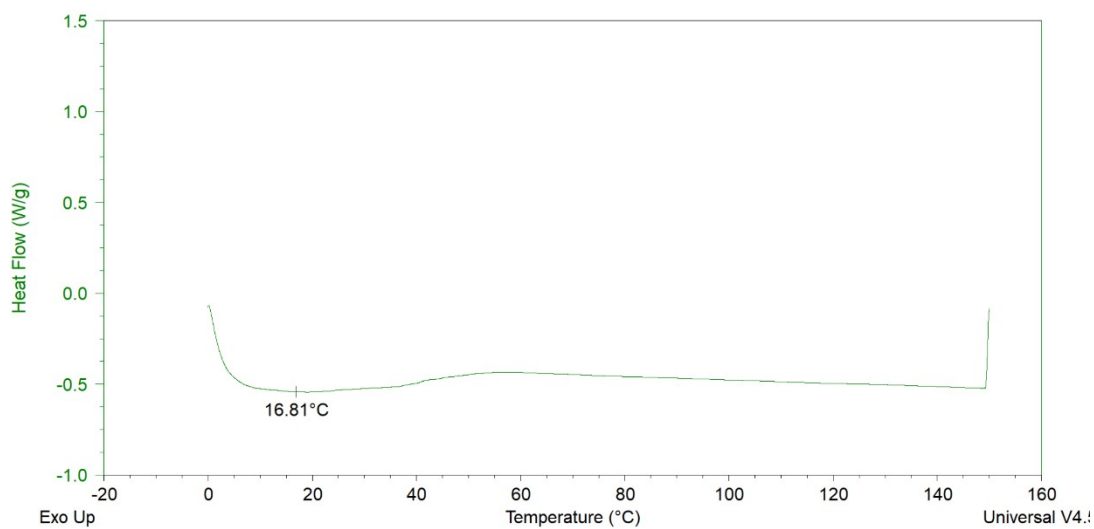

**Figure S26.** DSC of the poly( $\alpha$ -olefin) from table 1, entry 10.

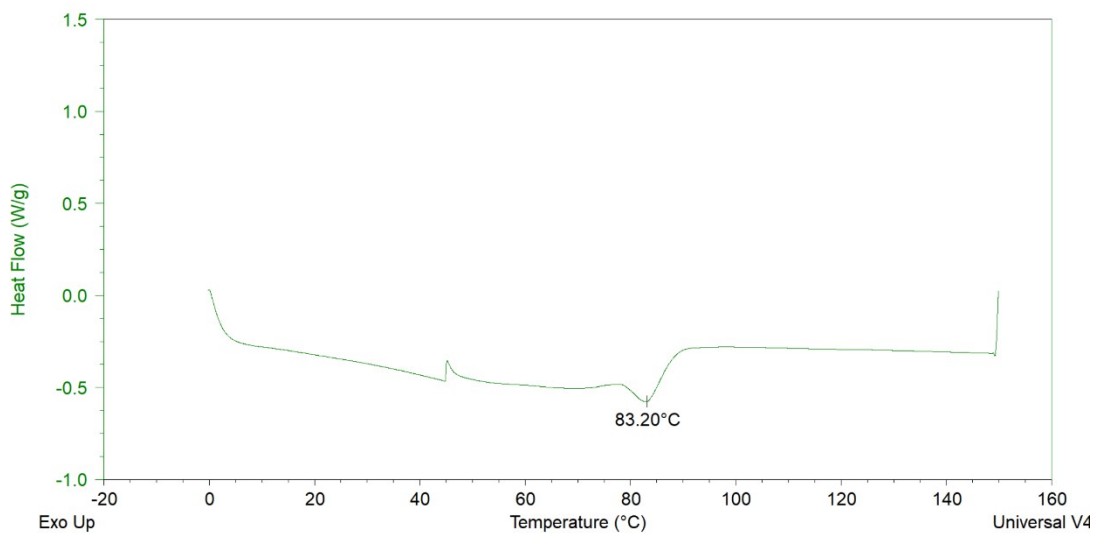

**Figure S27.** DSC of the poly( $\alpha$ -olefin) from table 1, entry 16.

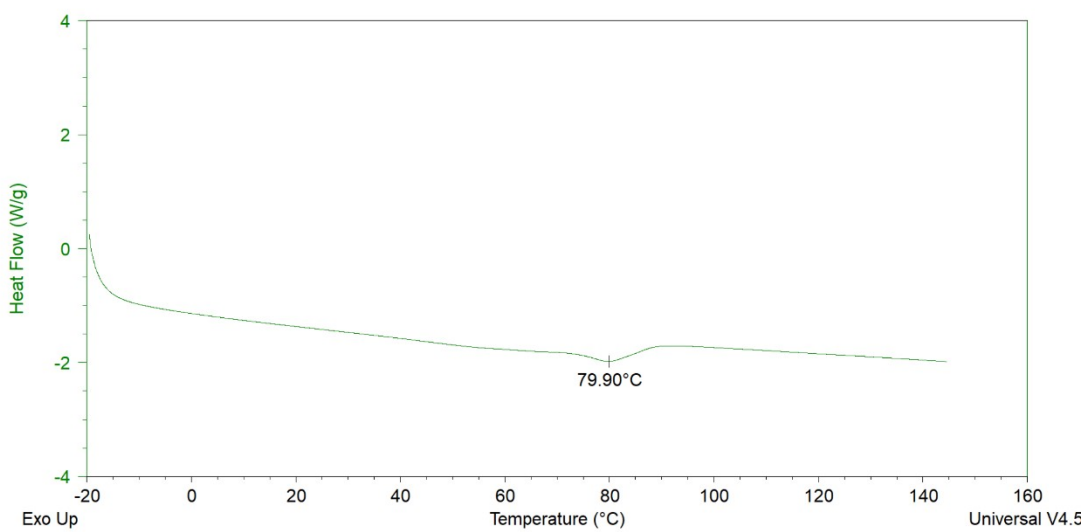

**Figure S28.** DSC of the poly( $\alpha$ -olefin) from table 1, entry 17.

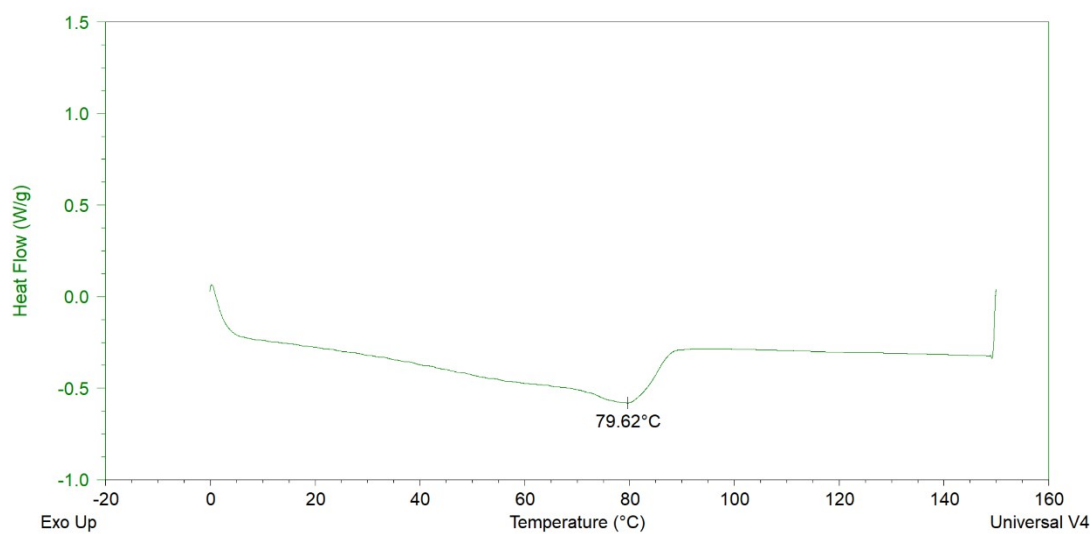

**Figure S29.** DSC of the poly( $\alpha$ -olefin) from table 1, entry 18.

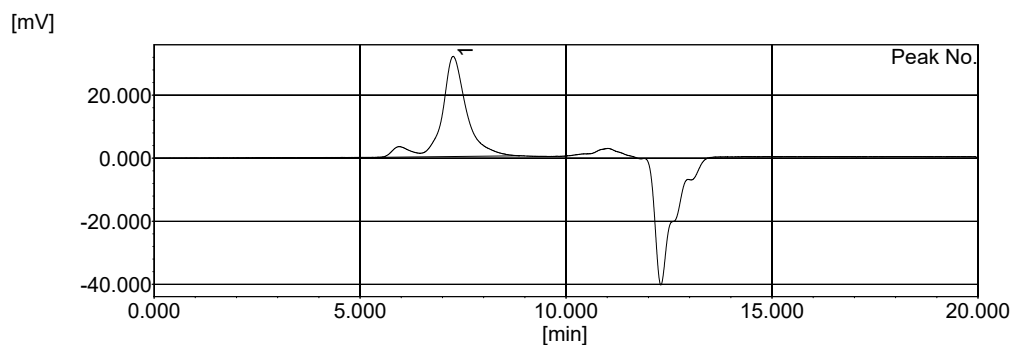

Result of molecular weight calculation (RI)

Peak 1 Base Peak

|               | [min] | [mV]   | [mol]        |         |         |
|---------------|-------|--------|--------------|---------|---------|
| Peak start    | 5.425 | 0.266  | 1,632,992    | Mn      | 88,629  |
| Peak top      | 7.263 | 32.322 | 106,918      | Mw      | 153,061 |
| Peak end      | 8.852 | 0.757  | 10,142       | Mz      | 355,040 |
|               |       |        |              | Mz+1    | 662,930 |
|               |       |        |              | Mv      | 153,061 |
| Height [mV]   |       |        | 31.793       | Mp      | 106,918 |
| Area [mV*sec] |       |        | 1354.864     | Mz/Mw   | 2.320   |
| Area% [%]     |       |        | 100.000      | Mw/Mn   | 1.727   |
| [eta]         |       |        | 153061.15312 | Mz+1/Mw | 4.331   |

**Figure S30.** GPC of the poly( $\alpha$ -olefin) from table 1, entry 1.

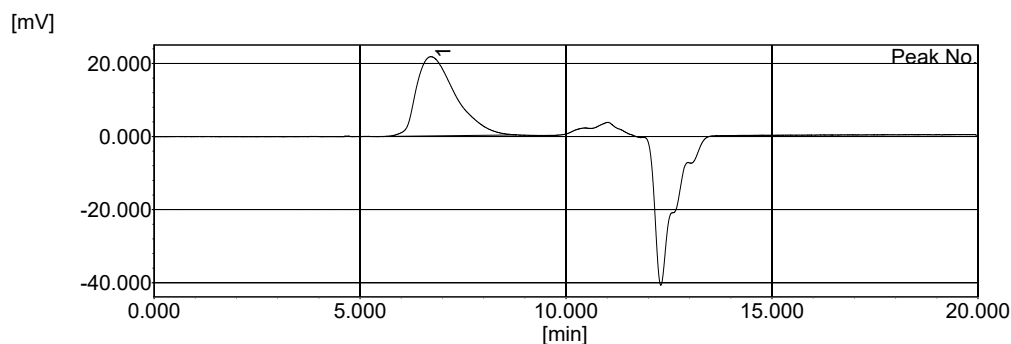

Result of molecular weight calculation (RI)

Peak 1 Base Peak

|               | [min] | [mV]   | [mol]        |         |         |
|---------------|-------|--------|--------------|---------|---------|
| Peak start    | 5.553 | 0.010  | 1,350,001    | Mn      | 130,902 |
| Peak top      | 6.722 | 21.889 | 238,725      | Mw      | 214,036 |
| Peak end      | 8.767 | 0.442  | 11,504       | Mz      | 295,407 |
|               |       |        |              | Mz+1    | 375,050 |
|               |       |        |              | Mv      | 214,036 |
| Height [mV]   |       |        | 21.722       | Mp      | 238,725 |
| Area [mV*sec] |       |        | 1431.074     | Mz/Mw   | 1.380   |
| Area% [%]     |       |        | 100.000      | Mw/Mn   | 1.635   |
| [eta]         |       |        | 214036.15783 | Mz+1/Mw | 1.752   |

**Figure S31.** GPC of the poly( $\alpha$ -olefin) from table 1, entry 2.

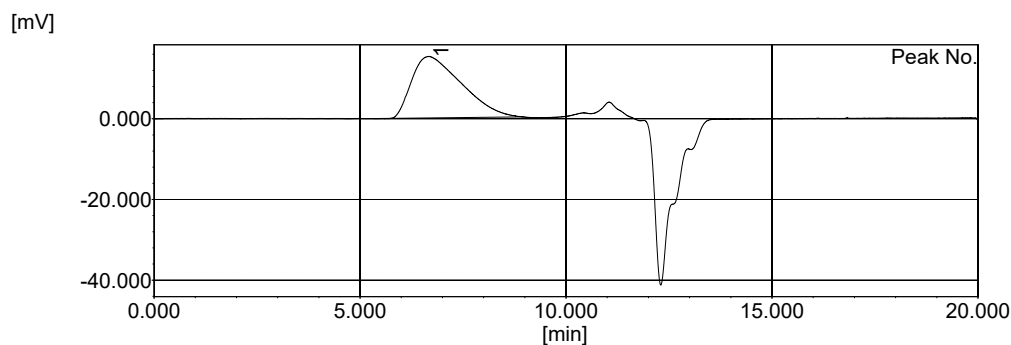

Result of molecular weight calculation (RI)

Peak 1 Base Peak

|               | [min] | [mV]   | [mol]        |         |         |
|---------------|-------|--------|--------------|---------|---------|
| Peak start    | 5.447 | 0.077  | 1,581,358    | Mn      | 109,824 |
| Peak top      | 6.670 | 15.484 | 257,734      | Mw      | 221,818 |
| Peak end      | 8.957 | 0.484  | 8,679        | Mz      | 340,237 |
|               |       |        |              | Mz+1    | 442,284 |
|               |       |        |              | Mv      | 221,818 |
| Height [mV]   |       |        | 15.265       | Mp      | 257,735 |
| Area [mV*sec] |       |        | 1280.008     | Mz/Mw   | 1.534   |
| Area% [%]     |       |        | 100.000      | Mw/Mn   | 2.020   |
| [eta]         |       |        | 221817.64896 | Mz+1/Mw | 1.994   |

**Figure S32.** GPC of the poly( $\alpha$ -olefin) from table 1, entry 3.

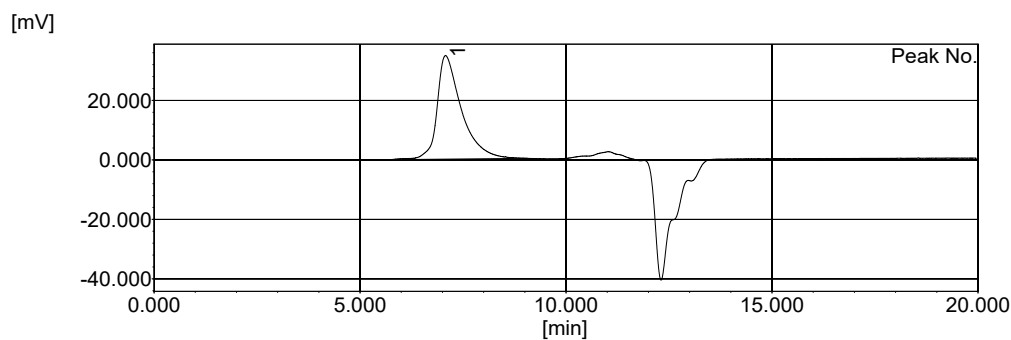



Result of molecular weight calculation (RI)

| Peak 1 Base Peak |       |        |              |         |         |
|------------------|-------|--------|--------------|---------|---------|
|                  | [min] | [mV]   | [mol]        |         |         |
| Peak start       | 5.468 | 0.018  | 1,531,357    | Mn      | 93,865  |
| Peak top         | 7.075 | 35.070 | 141,365      | Mw      | 126,857 |
| Peak end         | 9.043 | 0.529  | 7,632        | Mz      | 168,410 |
|                  |       |        |              | Mz+1    | 263,659 |
|                  |       |        |              | Mv      | 126,857 |
| Height [mV]      |       |        | 34.822       | Mp      | 141,365 |
| Area [mV*sec]    |       |        | 1432.746     | Mz/Mw   | 1.328   |
| Area% [%]        |       |        | 100.000      | Mw/Mn   | 1.351   |
| [eta]            |       |        | 126857.04114 | Mz+1/Mw | 2.078   |

Figure S33. GPC of the poly( $\alpha$ -olefin) from table 1, entry 4.

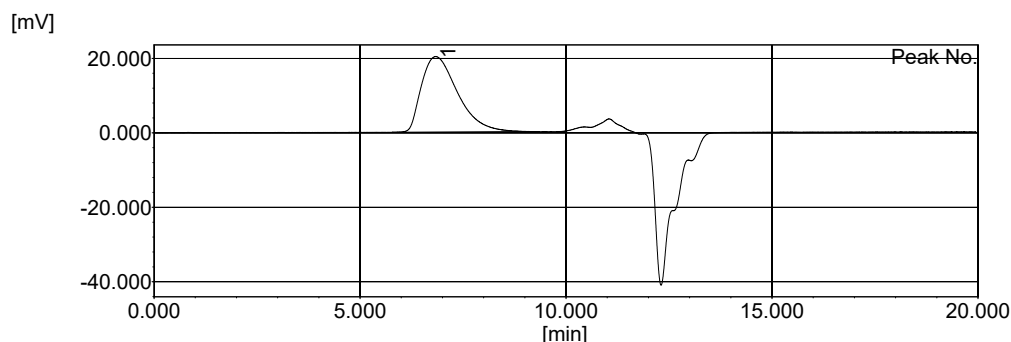

Result of molecular weight calculation (RI)

| Peak 1 Base Peak |       |        |              |         |         |
|------------------|-------|--------|--------------|---------|---------|
|                  | [min] | [mV]   | [mol]        |         |         |
| Peak start       | 5.787 | 0.165  | 955,128      | Mn      | 121,092 |
| Peak top         | 6.845 | 20.516 | 198,823      | Mw      | 185,356 |
| Peak end         | 9.085 | 0.373  | 7,175        | Mz      | 242,011 |
|                  |       |        |              | Mz+1    | 290,744 |
|                  |       |        |              | Mv      | 185,356 |
| Height [mV]      |       |        | 20.284       | Mp      | 198,824 |
| Area [mV*sec]    |       |        | 1235.482     | Mz/Mw   | 1.306   |
| Area% [%]        |       |        | 100.000      | Mw/Mn   | 1.531   |
| [eta]            |       |        | 185355.63018 | Mz+1/Mw | 1.569   |

Figure S34. GPC of the poly( $\alpha$ -olefin) from table 1, entry 5.

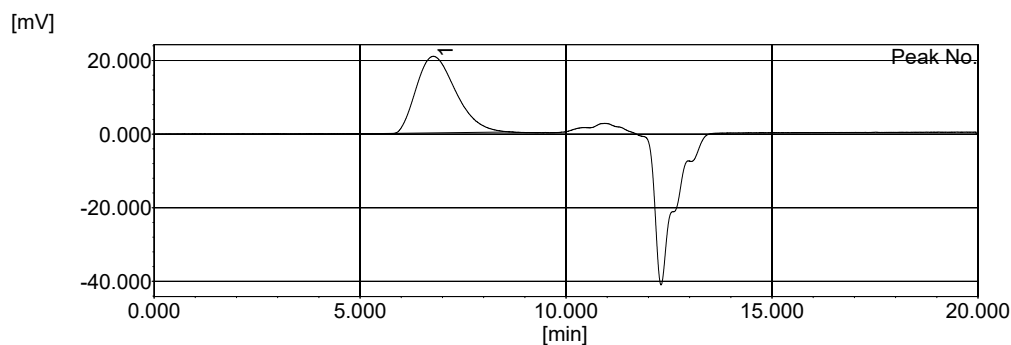

Result of molecular weight calculation (RI)

| Peak 1 Base Peak |       |        |              |         |         |
|------------------|-------|--------|--------------|---------|---------|
|                  | [min] | [mV]   | [mol]        |         |         |
| Peak start       | 5.405 | 0.158  | 1,682,150    | Mn      | 141,581 |
| Peak top         | 6.775 | 21.166 | 220,571      | Mw      | 221,973 |
| Peak end         | 8.702 | 0.577  | 12,668       | Mz      | 307,610 |
|                  |       |        |              | Mz+1    | 396,579 |
|                  |       |        |              | Mv      | 221,973 |
| Height [mV]      |       |        | 20.834       | Mp      | 220,572 |
| Area [mV*sec]    |       |        | 1387.857     | Mz/Mw   | 1.386   |
| Area% [%]        |       |        | 100.000      | Mw/Mn   | 1.568   |
| [eta]            |       |        | 221972.73816 | Mz+1/Mw | 1.787   |

**Figure S35.** GPC of the poly( $\alpha$ -olefin) from table 1, entry 6.

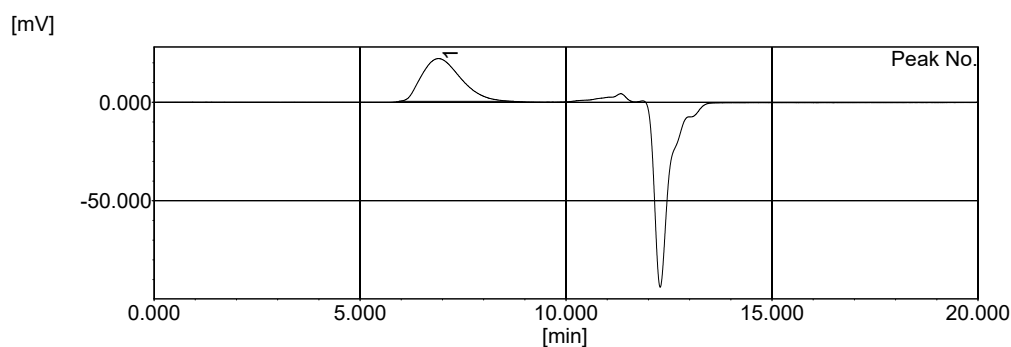

Result of molecular weight calculation (RI)

Peak 1 Base Peak

|               | [min] | [mV]   | [mol]        |         |         |
|---------------|-------|--------|--------------|---------|---------|
| Peak start    | 5.947 | 0.451  | 748,484      | Mn      | 118,755 |
| Peak top      | 6.900 | 22.201 | 182,155      | Mw      | 181,743 |
| Peak end      | 8.698 | 0.467  | 12,667       | Mz      | 246,288 |
|               |       |        |              | Mz+1    | 305,255 |
|               |       |        |              | Mv      | 181,743 |
| Height [mV]   |       |        | 21.744       | Mp      | 182,156 |
| Area [mV*sec] |       |        | 1432.937     | Mz/Mw   | 1.355   |
| Area% [%]     |       |        | 100.000      | Mw/Mn   | 1.530   |
| [eta]         |       |        | 181743.02798 | Mz+1/Mw | 1.680   |

**Figure S36.** GPC of the poly( $\alpha$ -olefin) from table 1, entry 8.

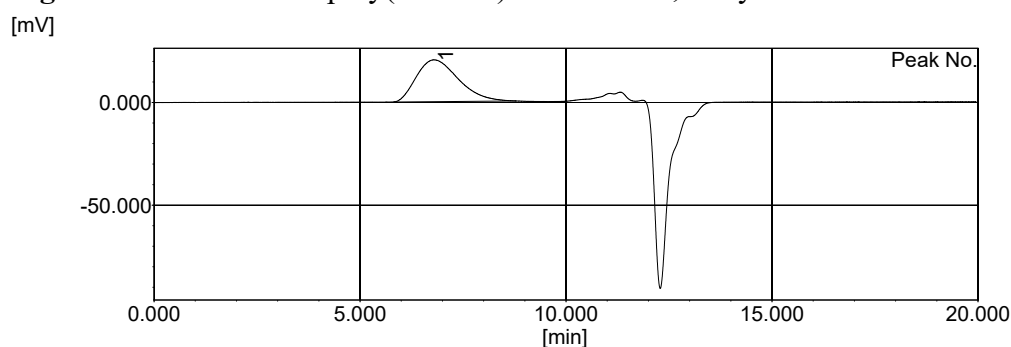

Result of molecular weight calculation (RI)

Peak 1 Base Peak

|               | [min] | [mV]   | [mol]        |         |         |
|---------------|-------|--------|--------------|---------|---------|
| Peak start    | 5.823 | 0.255  | 898,633      | Mn      | 128,584 |
| Peak top      | 6.785 | 20.781 | 216,011      | Mw      | 212,882 |
| Peak end      | 8.772 | 0.727  | 11,363       | Mz      | 300,535 |
|               |       |        |              | Mz+1    | 380,285 |
|               |       |        |              | Mv      | 212,882 |
| Height [mV]   |       |        | 20.372       | Mp      | 215,479 |
| Area [mV*sec] |       |        | 1444.498     | Mz/Mw   | 1.412   |
| Area% [%]     |       |        | 100.000      | Mw/Mn   | 1.656   |
| [eta]         |       |        | 212882.12150 | Mz+1/Mw | 1.786   |

**Figure S37.** GPC of the poly( $\alpha$ -olefin) from table 1, entry 9.

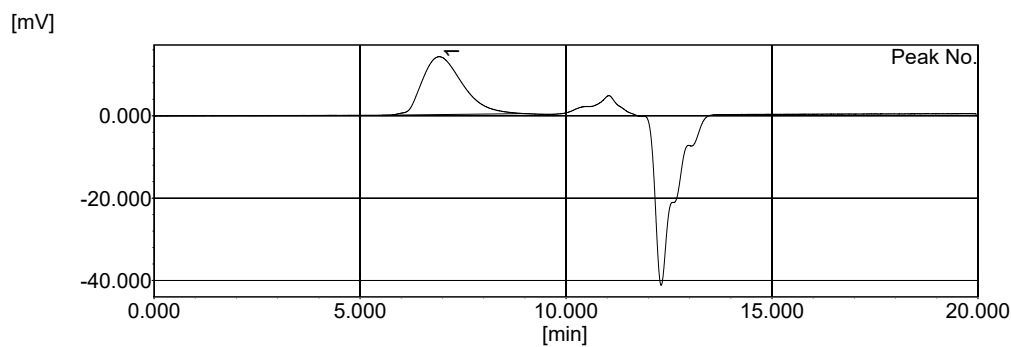

Result of molecular weight calculation (RI)

Peak 1 Base Peak

|               | [min] | [mV]   | [mol]        | Mn      |         |
|---------------|-------|--------|--------------|---------|---------|
| Peak start    | 5.532 | 0.129  | 1,394,081    | Mw      | 177,264 |
| Peak top      | 6.928 | 14.384 | 175,711      | Mz      | 253,153 |
| Peak end      | 9.022 | 0.536  | 7,882        | Mz+1    | 337,655 |
|               |       |        |              | Mv      | 177,264 |
| Height [mV]   |       |        | 14.092       | Mp      | 175,711 |
| Area [mV*sec] |       |        | 955.262      | Mz/Mw   | 1.428   |
| Area% [%]     |       |        | 100.000      | Mw/Mn   | 1.663   |
| [eta]         |       |        | 177264.00565 | Mz+1/Mw | 1.905   |

**Figure S38.** GPC of the poly( $\alpha$ -olefin) from table 1, entry 11.

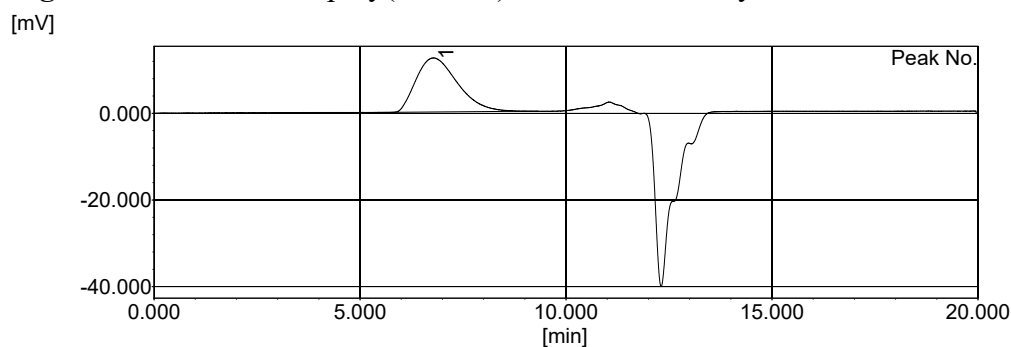

Result of molecular weight calculation (RI)

Peak 1 Base Peak

|               | [min] | [mV]   | [mol]        | Mn      |         |
|---------------|-------|--------|--------------|---------|---------|
| Peak start    | 5.425 | 0.218  | 1,632,992    | Mw      | 128,687 |
| Peak top      | 6.790 | 12.815 | 215,719      | Mz      | 216,728 |
| Peak end      | 9.298 | 0.502  | 5,229        | Mz+1    | 390,398 |
|               |       |        |              | Mv      | 216,728 |
| Height [mV]   |       |        | 12.497       | Mp      | 215,720 |
| Area [mV*sec] |       |        | 873.349      | Mz/Mw   | 1.407   |
| Area% [%]     |       |        | 100.000      | Mw/Mn   | 1.684   |
| [eta]         |       |        | 216728.31374 | Mz+1/Mw | 1.801   |

**Figure S39.** GPC of the poly( $\alpha$ -olefin) from table 1, entry 12.

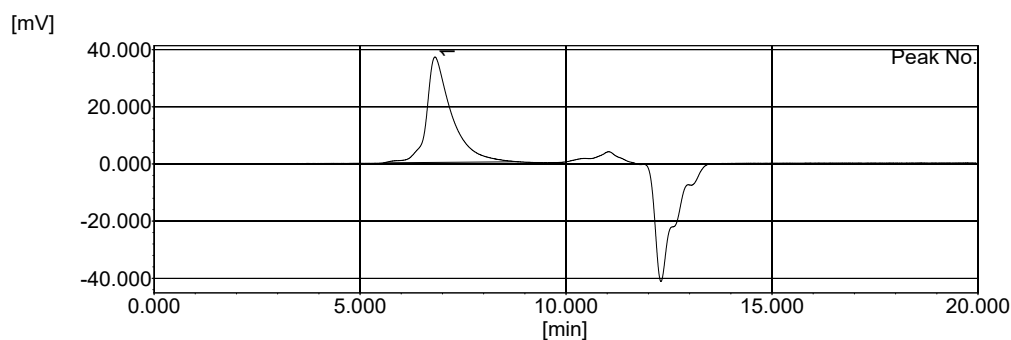

Result of molecular weight calculation (RI)

| Peak 1 Base Peak |       |        |              |         |         |
|------------------|-------|--------|--------------|---------|---------|
|                  | [min] | [mV]   | [mol]        |         |         |
| Peak start       | 5.595 | 0.399  | 1,269,112    | Mn      | 125,908 |
| Peak top         | 6.825 | 37.416 | 204,808      | Mw      | 185,079 |
| Peak end         | 8.830 | 0.750  | 10,473       | Mz      | 253,937 |
|                  |       |        |              | Mz+1    | 372,019 |
|                  |       |        |              | Mv      | 185,079 |
| Height [mV]      |       |        | 36.884       | Mp      | 204,809 |
| Area [mV*sec]    |       |        | 1561.710     | Mz/Mw   | 1.372   |
| Area% [%]        |       |        | 100.000      | Mw/Mn   | 1.470   |
| [eta]            |       |        | 185079.37974 | Mz+1/Mw | 2.010   |

**Figure S40.** GPC of the poly( $\alpha$ -olefin) from table 2, entry 1.

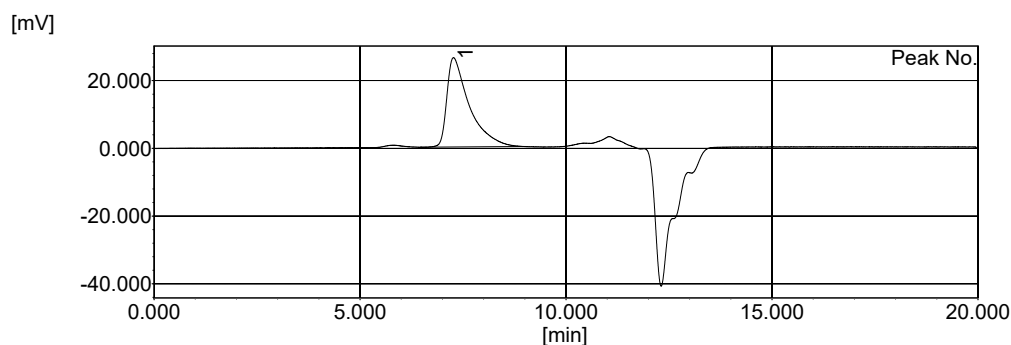

Result of molecular weight calculation (RI)

| Peak 1 Base Peak |       |        |             |         |         |
|------------------|-------|--------|-------------|---------|---------|
|                  | [min] | [mV]   | [mol]       |         |         |
| Peak start       | 6.468 | 0.346  | 347,577     | Mn      | 66,981  |
| Peak top         | 7.260 | 26.798 | 107,447     | Mw      | 85,619  |
| Peak end         | 9.000 | 0.546  | 8,139       | Mz      | 99,668  |
|                  |       |        |             | Mz+1    | 110,692 |
|                  |       |        |             | Mv      | 85,619  |
| Height [mV]      |       |        | 26.389      | Mp      | 107,448 |
| Area [mV*sec]    |       |        | 995.030     | Mz/Mw   | 1.164   |
| Area% [%]        |       |        | 100.000     | Mw/Mn   | 1.278   |
| [eta]            |       |        | 85619.06617 | Mz+1/Mw | 1.293   |

**Figure S41.** GPC of the poly( $\alpha$ -olefin) from table 2, entry 4.

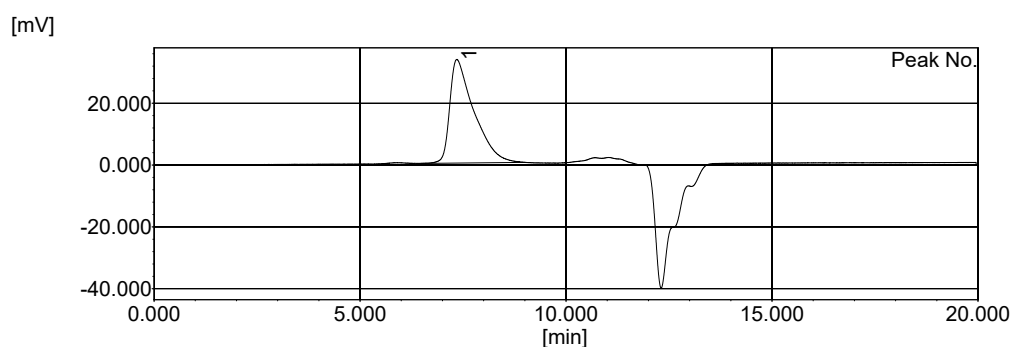

Result of molecular weight calculation (RI)

| Peak 1 Base Peak |       |        |             |         |         |
|------------------|-------|--------|-------------|---------|---------|
|                  | [min] | [mV]   | [mol]       |         |         |
| Peak start       | 6.490 | 0.531  | 336,587     | Mn      | 59,914  |
| Peak top         | 7.352 | 34.181 | 93,791      | Mw      | 76,069  |
| Peak end         | 9.000 | 0.851  | 8,139       | Mz      | 89,552  |
|                  |       |        |             | Mz+1    | 101,198 |
|                  |       |        |             | Mv      | 76,069  |
| Height [mV]      |       |        | 33.540      | Mp      | 93,791  |
| Area [mV*sec]    |       |        | 1364.774    | Mz/Mw   | 1.177   |
| Area% [%]        |       |        | 100.000     | Mw/Mn   | 1.270   |
| [eta]            |       |        | 76069.32778 | Mz+1/Mw | 1.330   |

**Figure S42.** GPC of the poly( $\alpha$ -olefin) from table 2, entry 10.
